# Supplementary material for: Changes in Tillering, Nutritional Status, and Biomass Yield of Panicum Maximum Used for Cadmium Phytoextraction
Source: Research Square preprint supplement (doi:10.21203/rs.3.rs-1247155/v1), 2022-01-14
Supplement: Supplementary file 1 [file 28bfa8ae6890faa9870be6c5.docx]

**Supplementary Fig. 1** Correlation between the nutrient use efficiency (NUE) of each nutrient and the Cd bioconcentration factor (Cd BCF) in the harvestable tissues (leaves I, II, III, other leaves and stems) collected at the end of the growth and regrowth period of *Panicum maximum* established in non-polluted and Cd-polluted Oxisol. ns = not significant (*n* = 80)
